# Supplementary material
Source: PubMed Central journal article supplement (PMC4747756)
Supplement: pnas.1520431113.sapp02.pdf [file pnas.1520431113.sapp02.pdf]

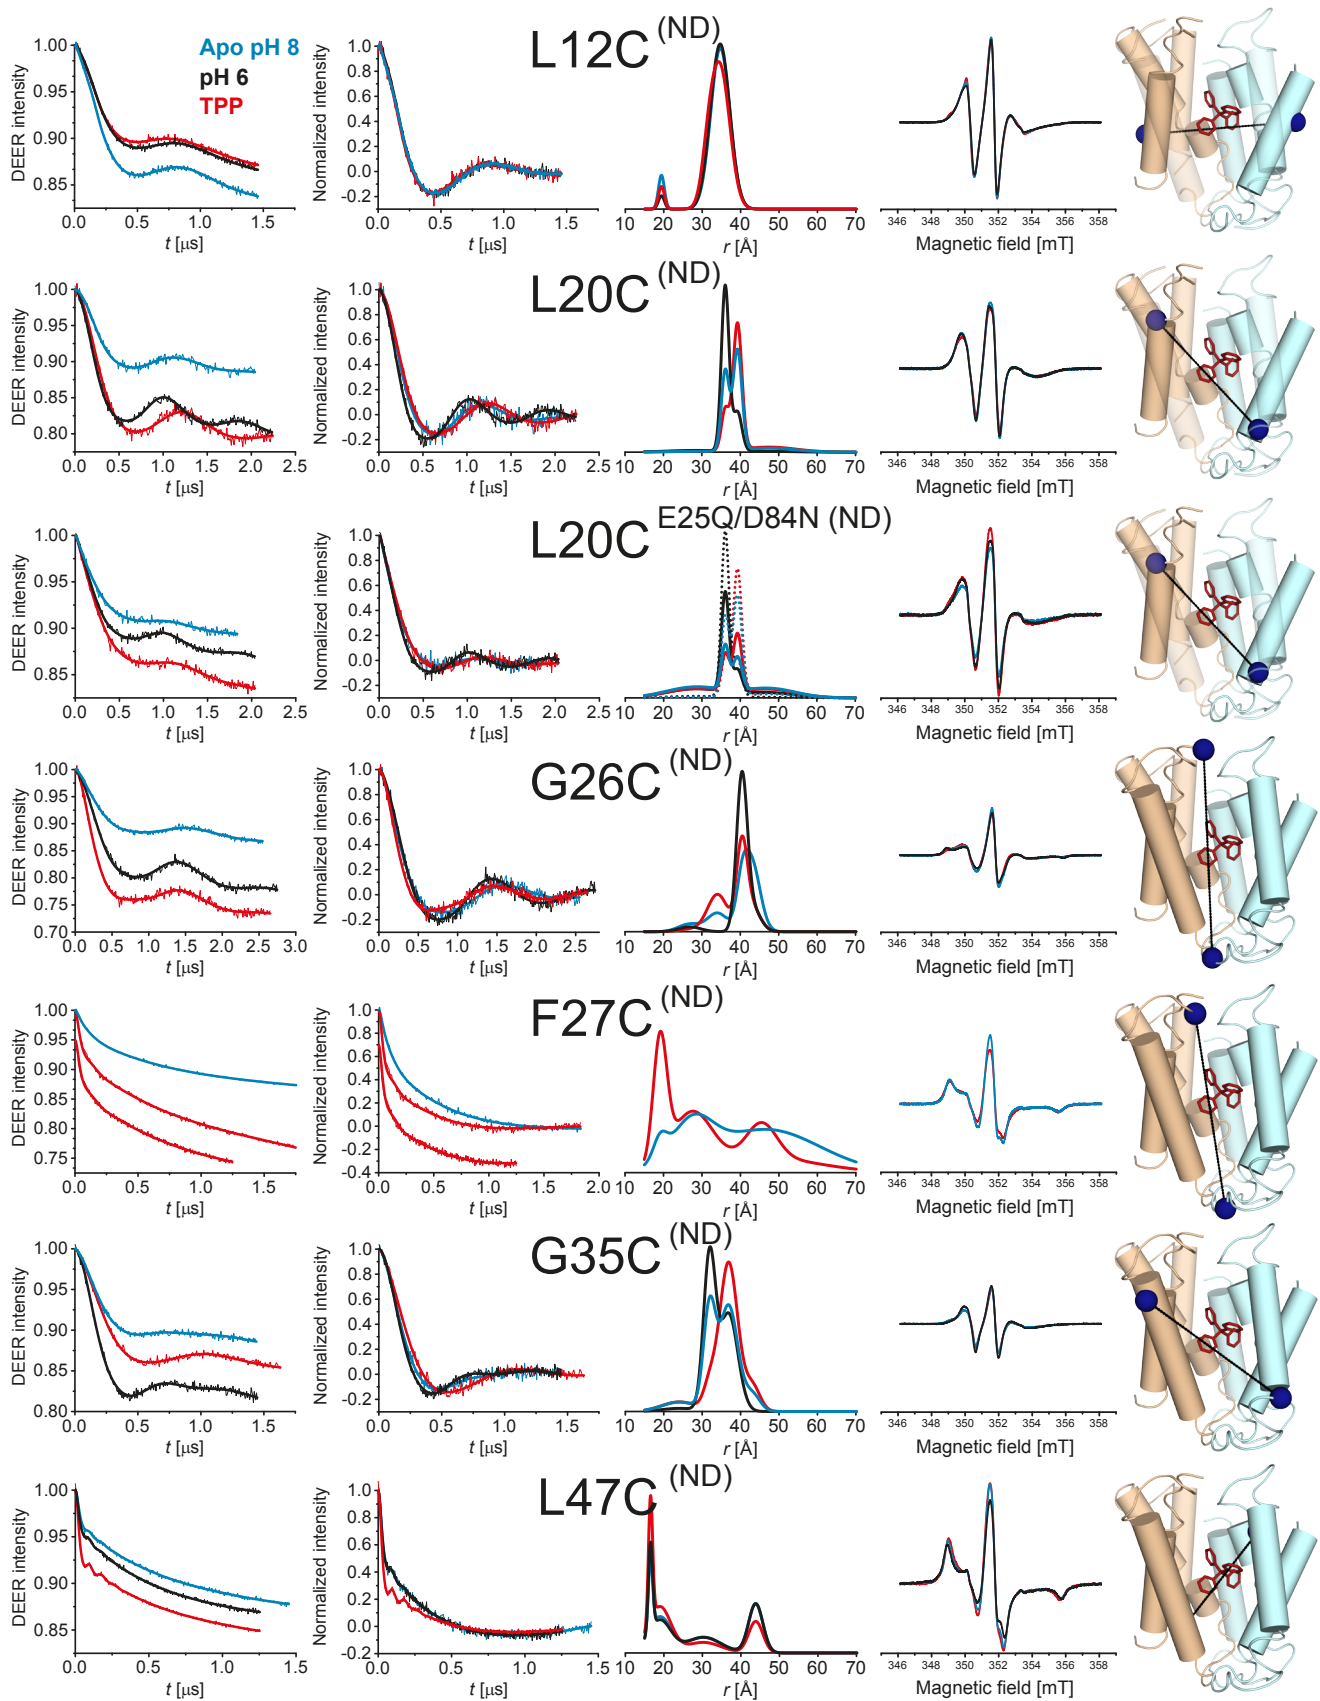

**SI Appendix 2A. DEER data analysis for mutants reconstituted in nanodiscs (ND) composed of *E. coli* polar lipids.** For each mutant, from left to right, primary DEER traces with the corresponding fits, baseline-corrected and normalized DEER traces along with the fits, distance distributions, the CW-EPR spectra, and the position of the mutated residue on the X-ray structure (PDB code 3B5D) are shown. The dotted distance distributions are the corresponding wild type distributions.

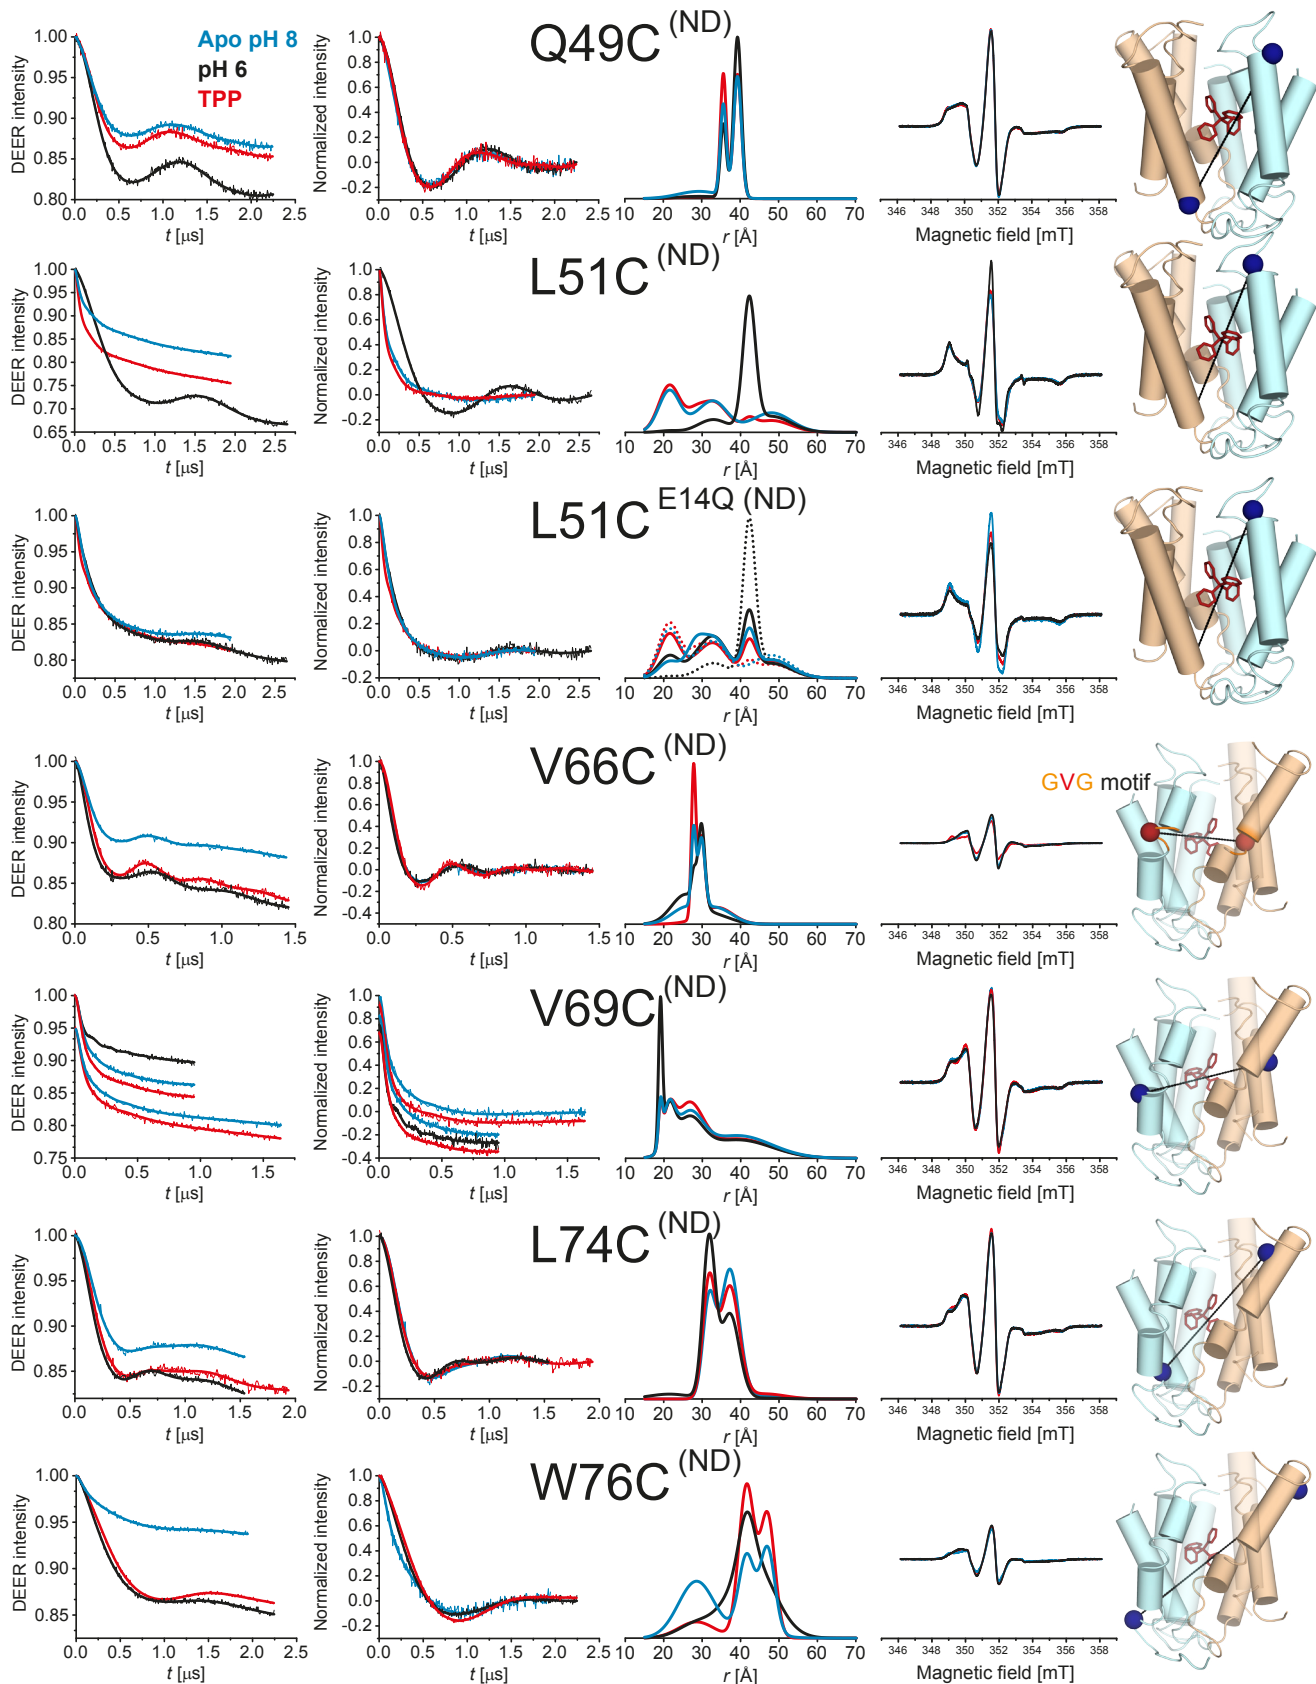

**SI Appendix 2B. DEER data analysis for mutants reconstituted in nanodiscs (ND) composed of *E. coli* polar lipids.** For each mutant, from left to right, primary DEER traces with the corresponding fits, baseline-corrected and normalized DEER traces along with the fits, distance distributions, the CW-EPR spectra, and the position of the mutated residue on the X-ray structure (PDB code 3B5D) are shown. The dotted distance distributions are the corresponding wild type distributions.

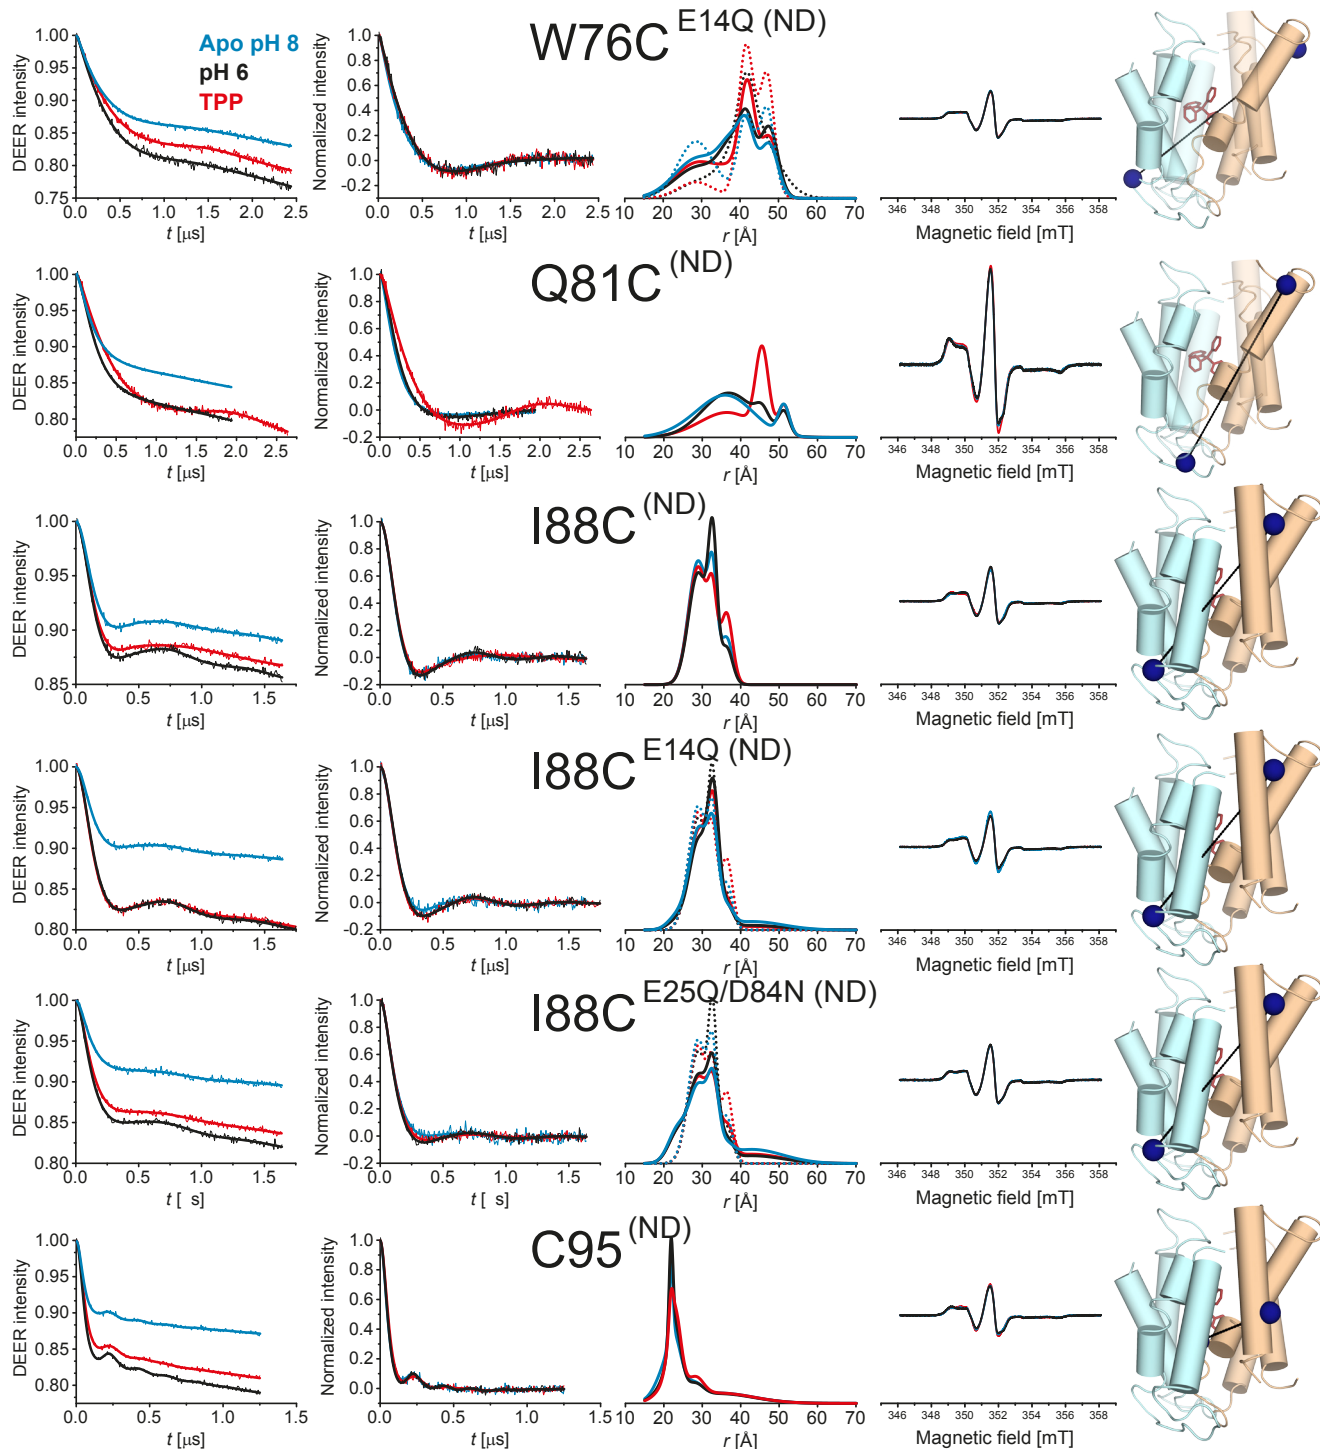

**SI Appendix 2C. DEER data analysis for mutants reconstituted in nanodiscs (ND) composed of *E. coli* polar lipids.** For each mutant, from left to right, primary DEER traces with the corresponding fits, baseline-corrected and normalized DEER traces along with the fits, distance distributions, the CW-EPR spectra, and the position of the mutated residue on the X-ray structure (PDB code 3B5D) are shown. The dotted distance distributions are the corresponding wild type distributions.
